# Supplementary material
Source: PubMed Central journal article supplement (PMC6589683)
Supplement: pnas.1821116116.sapp.pdf [file pnas.1821116116.sapp.pdf]

1

2

## Supplementary Information for

3

## Protein phosphatase 2A has an essential role in promoting

4

## thymocyte survival during selection

5

Mingzhu Zheng, Dan Li, Zhishan Zhao, Dmytro Shytikov, Qin Xu, Xuexiao Jin,

6

Jingjing Liang, Jun Lou, Songquan Wu, Lie Wang, Hu Hu, Yiting Zhou, Xiang Gao,

7

Linrong Lu

8

Correspondence should be addressed to:

9

L.L. (email: lu\_linrong@zju.edu.cn) and X.G. (email: gaoxiang@nju.edu.cn)

10

### This supporting information PDF-file includes:

11

Supporting information-Material and Methods

12

Fig. S1. Generation of PP2A conditional knockout mice

13

Fig. S2. PP2A conditional deletion in T cell lineage

14

Fig. S3. Phenotype of lymph node (LN) T cells in cKO mice

15

Fig. S4. Intact TCR Signaling in PP2Ac cKO thymocytes

16

Fig. S5. Cell apoptosis is increased after stimulation of Fas-L and TNF- $\alpha$

17

Fig. S6. Knockout of *p53* can partly rescue cell number

18

References

## 19 **Supporting information-Materials and Methods**

20 **Antibodies.** The biotin anti-mouse CD3 (145-2C11), biotin anti-mouse CD4 (GK1.5),  
21 anti-mouse CD28 (37.51), antibodies were from Biolegend (San Diego, CA, USA).  
22 The anti-PLC- $\gamma$  phospho-Tyr783 (2821), anti-ERK1-ERK2 (9102), anti-ERK1-ERK2  
23 phospho-Thr202 and Tyr204 (9101), anti-Jnk1-Jnk2 (56G8), antibody to Jnk1-Jnk2  
24 phosphorylated at Thr183 and Tyr185 (9251), anti-Akt (C67E7), antibody to Akt  
25 phosphorylated at Ser473 (D9E), anti-Bcl2, anti-Bcl-xl, anti-Bim, anti-Bax, anti-Bad,  
26 anti-GAPDH were from Cell Signaling Technology (Danvers, MA, USA). The  
27 anti-PP2Ac was from Millipore.

28 Fluorescein isothiocyanate-conjugated antibody to mouse CD4 (L3T4), CD8(Ly-2),  
29 CD69 (H1.2F3), CD5 (Ly-1), CD3 (145-2C11) or BrdU (PRB-1);  
30 allophycocyanin-conjugated antibody to mouse CD62L (MEL-14) and TCR $\beta$   
31 (H57-597) were from BD Biosciences.

32 **Immunoblot analysis.** Cells were lysed in SDS sample buffer by the addition of 1/4  
33 volume of 5 $\times$ SDS sample buffer directly into cell suspension. The samples were then  
34 boiled for 5 min and separated by 10% SDS-PAGE.

35 **Ca<sup>2+</sup> flux.** 1 $\times$ 10<sup>6</sup> thymocytes in suspension were first labeled with 4  $\mu$ g/ml Fluo4  
36 (Invitrogen) for 1 h at 37  $^{\circ}$ C, washed with ice-cold PBS and re-suspended in PBS.  
37 Cells were surface labeled with phycoerythrin-indocarbocyanine-conjugated anti-CD4  
38 and allophycocyanin-conjugated anti-CD8 for 30 min on ice and then incubated with  
39 biotinylated anti-CD3 (5  $\mu$ g/ml) and anti-CD4 (5  $\mu$ g/ml). The labeled cells were  
40 warmed for 20 min at room temperature and then crosslinked with streptomycin (25  
41  $\mu$ g/ml) or stimulated with PMA (phorbol 12-myristate 13-acetate) and ionomycin  
42 immediately before flow cytometry analysis. Mean fluorescence ratios were plotted  
43 after analysis with FlowJo software (TreeStar).

44 **Proliferation *in vivo* (BrdU).** Intraperitoneal injection was used to administer BrdU  
45 (1mg/mouse), 18 hours later, mice were sacrificed to obtain the thymocytes and  
46 splenocytes. 2 $\times$ 10<sup>6</sup> cells were suspended in 100 $\mu$ l PBS with surface marker antibodies  
47 for CD4 or CD8 (eBioscience) in 4  $^{\circ}$ C for 30 min. These were centrifuged, and IC  
48 fixation buffer was added at 4  $^{\circ}$ C overnight. Cells were treated  
49 with 1 $\times$ permeabilization buffer for 2min on ice, and then treated with DNase I  
50 buffer(30 $\mu$ l 10 $\times$ buffer, 220 $\mu$ l ddH<sub>2</sub>O, 50U DNase I) for 37  $^{\circ}$ C for 30 min, then

51 resuspended with 3  $\mu$ l FITC anti-BrdU (eBioscience) in 300  $\mu$ l 1  $\times$  BrdU staining buffer  
52 at 4  $^{\circ}$ C for 30 min before analysis with flow cytometry.

53 **Cell Cycle analysis.**  $2 \times 10^6$  cells were stained for CD4 or CD8 (eBioscience) at 4  $^{\circ}$ C  
54 for 30 min and fixed in buffer IC prior to permeabilization. Propidium Iodide (PI) and  
55 RNase A buffer was then added at 4  $^{\circ}$ C for 40 min before analysis with flow  
56 cytometry.

57 **Glycolytic and mitochondrial respiration rate measurement.** For metabolic  
58 experiments, a Seahorse XF24 instrument was used. Total thymocytes were seeded at  
59 a density of  $5 \times 10^5$  per well. The extracellular acidification rate (ECAR) and the  
60 oxygen consumption rate (OCR) for each well were calculated, while the cells were  
61 subjected to the XF Cell Mito or the XF Glycolytic stress test protocols. The XF Cell  
62 Mito and the XF Glycolytic stress test kit were purchased from Seahorse Biosciences.

63 Statistical significance was defined as  $P < 0.05$ .

64

65 **Supplementary Figures**

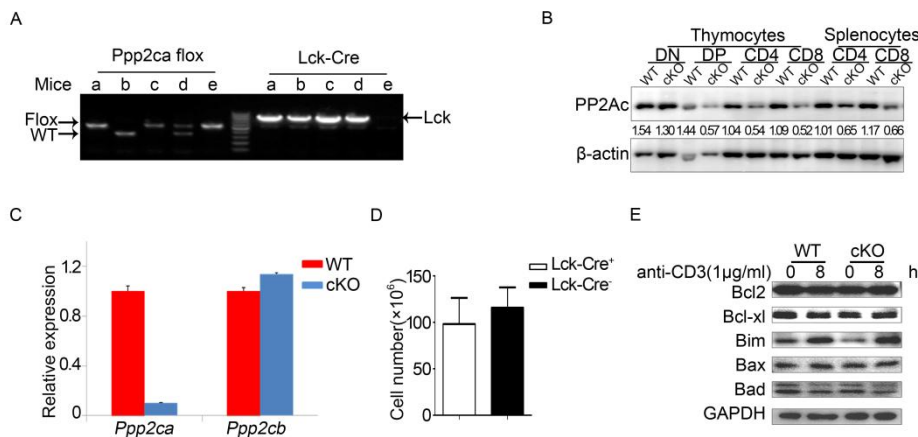

66

67 **Fig. S1 Generation of PP2A conditional knockout mice**

68 **(A)** Genotyping: *Ppp2ca* Floxed allele (593 bp) was detected by the primer set F/R.  
69 Flox forward primer: 5'-TAGCCCATGCCTTTAATCTCAGAGC-3'. Flox reverse  
70 primer: 5'-CACTCGTCGTAGAACCATAAACC-3'. Lck-Cre transgene was  
71 detected by Lck-Cre forward primer: 5'-GGAAAATGCTTCTGTCCGTTTG-3'.  
72 Lck-Cre reverse primer: 5'-TTGGTCCAGCCACCAGCTTG-3'. Resulted in the  
73 amplification of a 800 bp band. Mice a and c were Lck-Cre<sup>+</sup>*Ppp2ca*<sup>flox/flox</sup> cKO mice.  
74 **(B)** Western Blot analysis of PP2A catalytic  $\alpha$  subunit prepared from populations  
75 sorted from central and peripheral lymphoid organs in WT and cKO mice. The values  
76 for densities of PP2Ac/ $\beta$ -actin band from the same lane were determined by using the  
77 Image J software. **(C)** RT- PCR reaction was performed to detect the expression of  
78 *Ppp2ca* and *Ppp2cb* in cKO thymocytes. *Ppp2cb* serves as a negative control. **(D)**  
79 Total thymocyte number of Lck-Cre<sup>+</sup> mice and its litter mate Lck-Cre<sup>-</sup> mice. Data are  
80 representative of three experiments. Error bars show mean  $\pm$  SEM. **(E)** Immunoblot  
81 analysis of pro- (Bim, Bax, Bad) and anti- (Bcl2, Bcl-xl) apoptosis protein levels.  
82 GAPDH serves as a loading control.

83

84

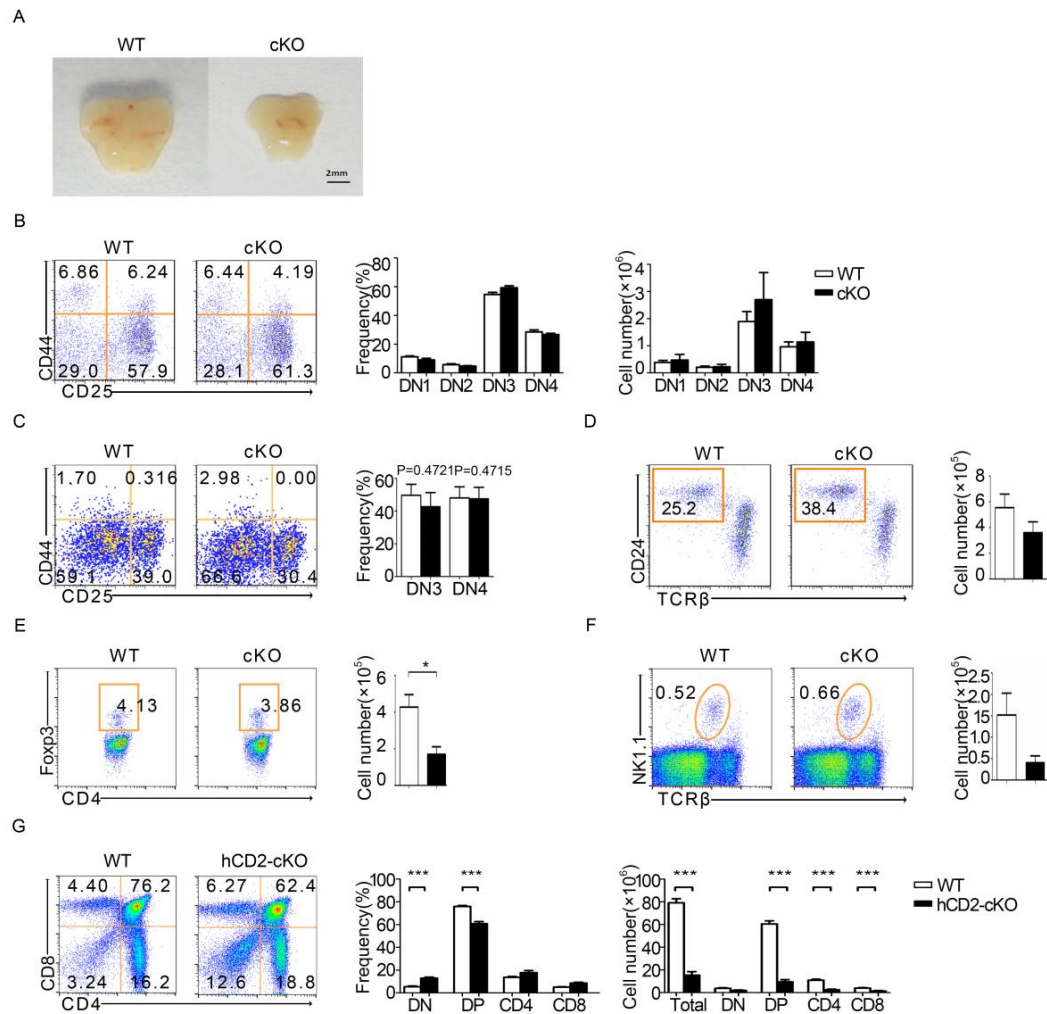

**Fig. S2 PP2A conditional deletion in T cell lineage**

(A) Thymus size in WT and cKO mice (Scale bar 2mm). (B) Two parameter dot plots show CD44 versus CD25 surface staining of CD4<sup>+</sup>CD8<sup>-</sup> thymocytes. Right, the frequency and cell number of DN1-DN4 thymocyte subpopulations. (C) Flow cytometry analysis of CD44 versus CD25 gated on DN thymocytes co-cultured with OP9-DL1 cells at day 5. Right, the frequency DN3, DN4 subpopulations. (D) Surface staining of CD24 and TCR $\beta$  to analyze cell number of ISP. (E, F) Analysis of nTreg (E) and NKT cells (F) in thymus. (G) Cell surface staining of CD4 and CD8 on WT and *Ppp2ca*<sup>fllox/fllox</sup> hCD2-Cre cKO thymocytes. Numbers in or adjacent to outlined areas (or in quadrants) indicate percentage. Bar charts indicate the cell frequencies and numbers for total thymocytes DN, DP, CD4<sup>+</sup> or CD8<sup>+</sup> SP thymocyte subpopulations. Data are representative of five experiments. \*P < 0.05; \*\*P < 0.01; \*\*\*P < 0.001.

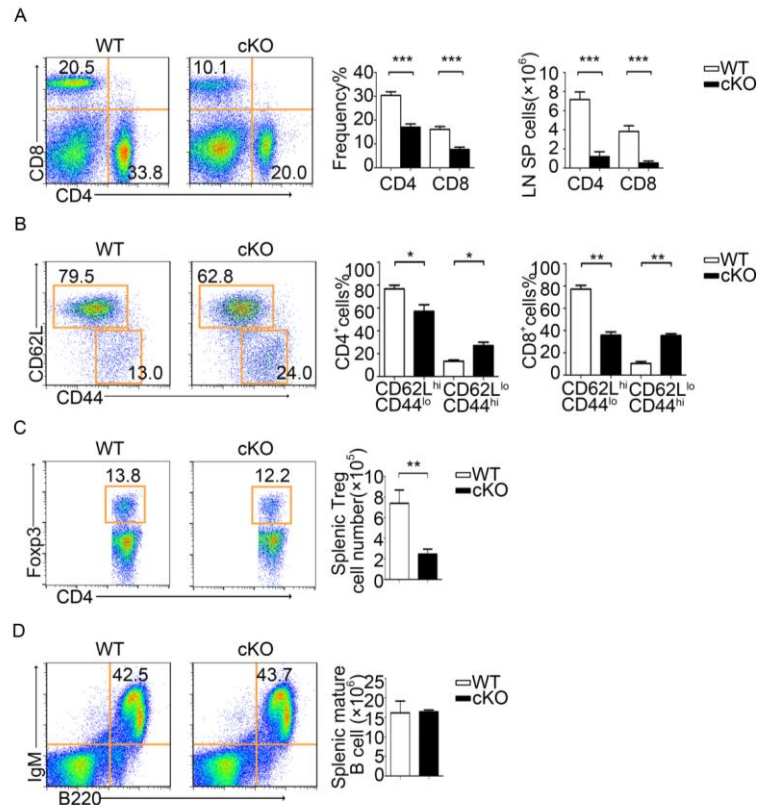

103  
 104  
 105  
 106  
 107  
 108  
 109  
 110  
 111  
 112  
 113  
 114  
 115  
 116

**Fig. S3 Phenotype of lymph node (LN) T cells in cKO mice**

(A) Surface staining of CD4 and CD8 on WT and cKO LN (left), and frequency (middle) and cell number (right) of LN subpopulations. (B) Expression of CD62L and CD44 on CD4<sup>+</sup> LN from WT and cKO mice (left), and frequency of CD62L<sup>hi</sup>CD44<sup>lo</sup> CD4<sup>+</sup> and CD62L<sup>lo</sup>CD44<sup>hi</sup> CD4<sup>+</sup> subpopulations. (C, D) Analysis of pTreg (C) and B cell (D) in the peripheral. Data are representative of three experiments. Error bars show mean ± SEM. \*P < 0.05; \*\*P < 0.01; \*\*\*P < 0.001.

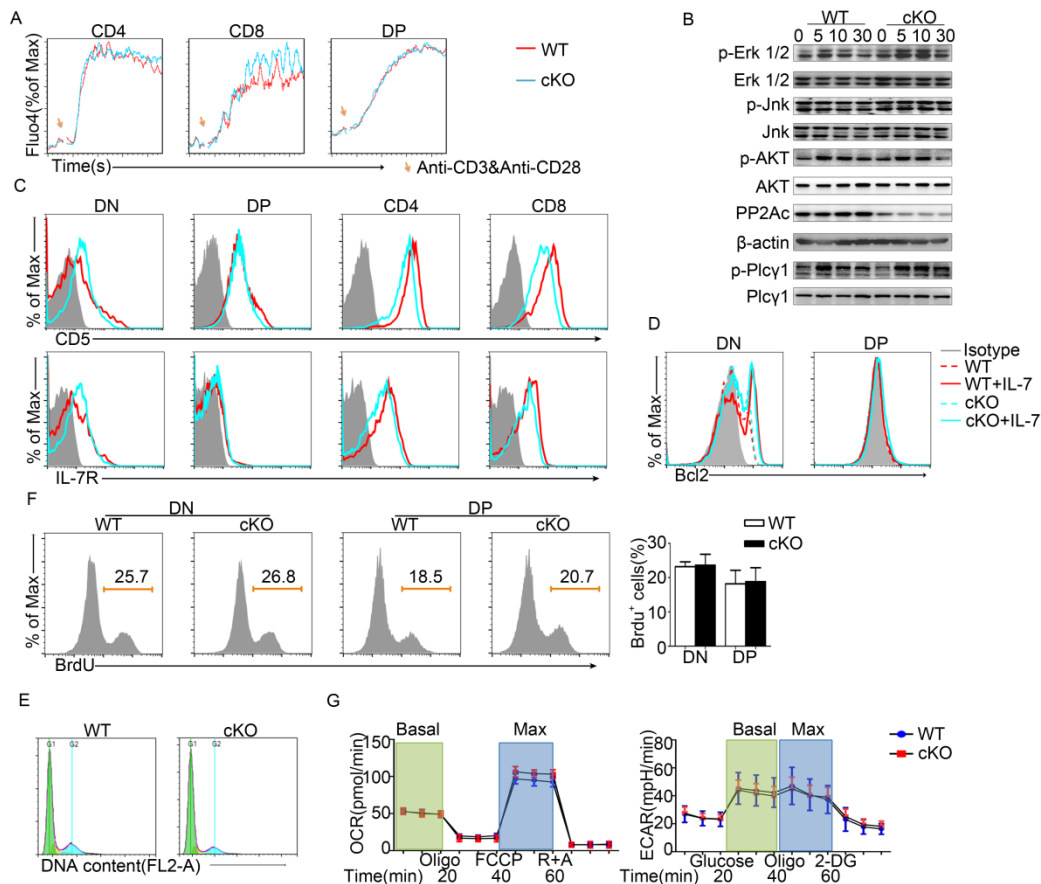

117

118

**Fig. S4 Intact TCR Signaling in PP2Ac cKO thymocytes**

119

(A) Calcium flux in CD4, CD8 or DP thymocytes from WT and cKO mice after stimulation (downward arrows) with anti-CD3 and anti-CD28 (1).

120

(B) Immunoblot analysis of total and phosphorylated proteins of sorted WT and cKO DP thymocytes stimulated for 0, 5, 10 or 30 min with anti-CD3 and anti-CD28.  $\beta$ -actin serves as a loading control.

121

(C) Surface staining of CD5 and IL-7R on DN and DP thymocytes in WT and cKO thymocytes.

122

(D) The expression of Bcl2 in DN and DP cells with or without 10 ng/ml IL-7 overnight.

123

(E) Cell cycle of DP cells by Propidium Iodide (PI) staining (1).

124

(F) BrdU uptake by DN or DP cells, numbers above bracketed lines indicate percent of BrdU<sup>+</sup> cells (1). Data are representative of four independent experiments.

125

(G) The oxygen-consumption rate (OCR) (left) and extracellular acidification rate (ECAR) (right) of WT and cKO total thymocytes in basal conditions (Basal) or at maximum (Max), with the addition (vertical dashed lines) of oligomycin, the mitochondrial uncoupler FCCP and rotenone plus antimycin A (R+A) (left) or glucose, oligomycin (Oligo) and 2-deoxy-d-glucose (2-DG) (right), assessed by a mitochondrial stress test (left) or glycolysis stress test (right)(2).

126

127

128

129

130

131

132

133

134

135

136

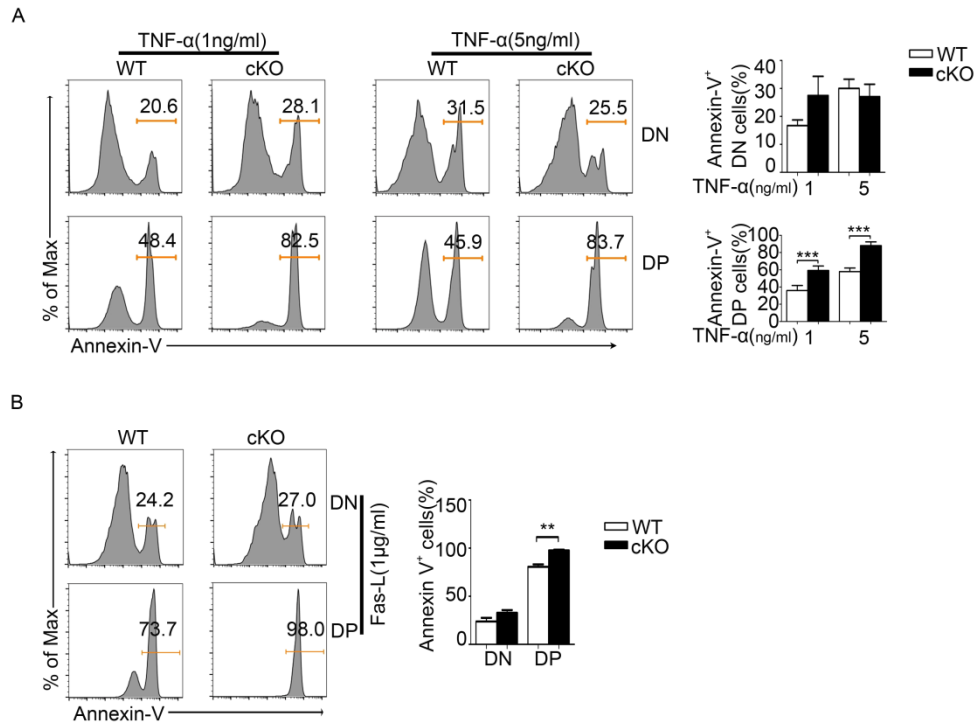

137

138 **Fig. S5 Cell apoptosis is increased after stimulation of Fas-L and TNF- $\alpha$**

139 **(A)** Annexin V staining of DN and DP cells left stimulated with different dose of

140 TNF- $\alpha$  for 20 h in vitro, and quantification of Annexin V<sup>+</sup> cells (right). \*\*P < 0.01 and

141 \*\*\*P < 0.001. **(B)** Annexin-V staining of DN and DP cells left stimulated with

142 Fas-L(1 $\mu$ g/ml) for 20h in vitro, and quantification of Annexin V<sup>+</sup> cells (right). Data

143 are representative of three experiments. \*\*P < 0.01 and \*\*\*P < 0.001.

144

145

146

147

148

149

150

151

152

153

154



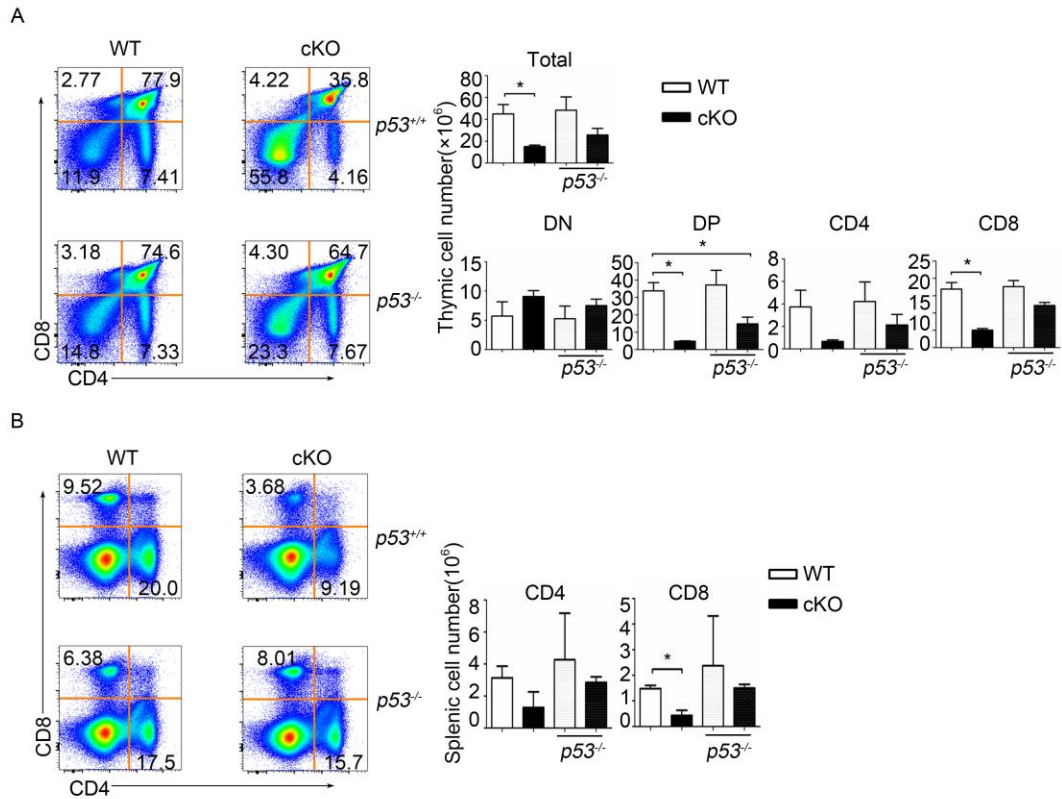

155  
 156  
 157  
 158  
 159  
 160  
 161  
 162  
 163  
 164  
 165

**Fig. S6 Knockout of *p53* can partly rescue cell number**

(A) Surface staining of CD4 and CD8 on WT and cKO on *p53*<sup>-/-</sup> background thymocytes (left). Numbers in or adjacent to outlined areas (or in quadrants) indicate percent cells in each throughout. Right, the frequency and cell number of total, DN, DP thymocyte subpopulations. (B) Surface staining of CD4 and CD8 on WT and cKO on *p53*<sup>-/-</sup> background splenocytes (left), and cell number of splenocyte subpopulations (right). Data are representative of three experiments. \*P < 0.05.

166  
167  
168  
169  
170  
171

**References:**

1. Wang D, *et al.* (2012) Tespa1 is involved in late thymocyte development through the regulation of TCR-mediated signaling. *Nat Immunol* 13(6):560-568.
2. Apostolidis SA, *et al.* (2016) Phosphatase PP2A is requisite for the function of regulatory T cells. *Nat Immunol* 17(5):556-564.
